# Supplementary material for: Biometrics, Impact, and Significance of Basal Linear Deposit and Subretinal Drusenoid Deposit in Age-Related Macular Degeneration
Source: PubMed Central journal article supplement — Invest Ophthalmol Vis Sci. 2021 Jan 29;62(1):33. doi: 10.1167/iovs.62.1.33 (PMC7846955; doi:10.1167/iovs.62.1.33), 2021-01-29
Supplement: iovs-62-1-33_s001.pdf [file iovs-62-1-33_s001.pdf]

## **Biometrics, impact, and significance of basal linear deposit and subretinal drusenoid deposit in age-related macular degeneration**

**Ling Chen MD PhD<sup>1,2</sup>; Jeffrey D. Messinger DC<sup>2</sup>; Deepayan Kar MS<sup>2</sup>, Jacque L. Duncan MD<sup>3</sup>; Christine A. Curcio PhD<sup>2</sup>**

### **Supplementary material – Methods and Supplementary Figure 1**

#### Histologic preparation

Eyes were accessioned from non-diabetic white donors to Advancing Sight Network (formerly the Alabama Eye Bank, Birmingham AL USA). Ophthalmic histories were not available for most donors. Eyes were collected from 1995-2012 and retained in fixative. Eyes with drusen are underrepresented, because some specimens were removed for other studies.<sup>53</sup> All eyes were preserved in 1% paraformaldehyde and 2.5% glutaraldehyde in a 0.1M phosphate buffer with an average death-to-preservation time of 3:49 (range 0:40-11:40).

Macula-wide, full-thickness tissue punches were obtained with an 8.25 mm diameter trephine (#68825-L, Howard Instruments, Tuscaloosa AL). Punches were post-fixed and embedded in epoxy resin (PolyBed 812, Polysciences, Warrington PA), tissues were sectioned at 0.8  $\mu$ m starting at the superior edge of the punch, as indexed by the microtome counter, and stained with toluidine blue. Sections were saved at ~2 mm from this starting point to capture the rise of rod density in superior perifovea. More sections were saved at ~4 mm from the top to capture the rod-free zone. Sections at each of these two locations (Superior and Central) were scanned in their entirety and digitized using image stitching software (CellSens, Olympus).

#### Histologic diagnosis

Early-intermediate AMD was defined histologically<sup>18</sup> as the absence of MNV and its sequelae, AND the presence of one large druse (>125  $\mu$ m in diameter) OR severe RPE dysmorphia in the setting of drusen or continuous BLinD. Control eyes did not meet criteria for AMD and lacked histologic evidence for other chorioretinal pathology.

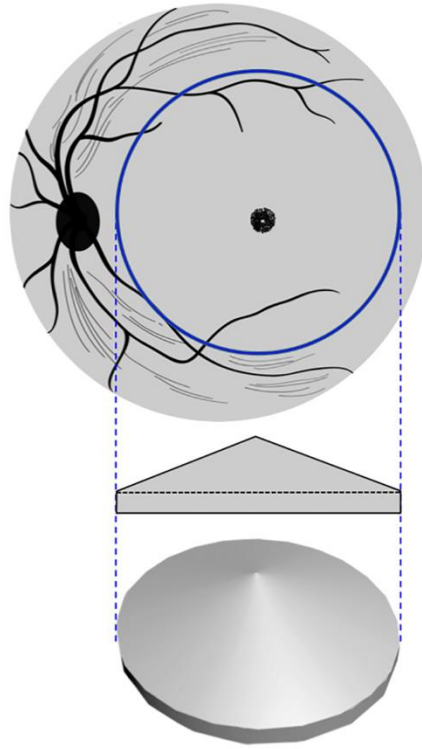

**Supplementary Figure 1. Geometric model of basal linear deposits (BLinD).**

Top, in a 6 mm diameter foveal-centered area corresponding to the ETDRS grid, thicknesses of BLinD were measured at pre-determined locations in high-resolution histological sections. Middle and bottom, BLinD is thick at the foveal center and thin (but non-zero) at the macular edge. It was thus modeled as a low conical solid of rotation on top of a circular disk of uniform thickness. The height and slope of the surface of the cone was determined by fitting regression lines to the distribution of thicknesses as a function of eccentricity, as described in the Methods.
